# Supplementary material
Source: PubMed Central journal article supplement (PMC6763979)
Supplement: jamaoncol-6-e192974-s001.pdf [file jamaoncol-6-e192974-s001.pdf]

## Supplementary Online Content

Pidala J, Martens M, Anasetti C, et al. Factors associated with successful discontinuation of immune suppression after allogeneic hematopoietic cell transplantation. *JAMA Oncol*. Published online September 26, 2019. doi:10.1001/jamaoncol.2019.2974

**eMethods.** Detailed Methodology

**eFigure 1.** Multistate Model for Discontinuation of IS

**eFigure 2.** State Probability From Time of ISD Failure

**eTable 1.** Characteristics of Patients From CTN 0201 and CTN 0402

**eTable 2.** Dynamic Prediction Model of Likelihood of Being off IS Without GVHD at 1 Year Time Horizon

**eTable 3.** Dynamic Prediction Model of Likelihood of Being off IS Without GVHD at 3 Year Time Horizon

**eTable 4.** Dynamic Prediction Model of Likelihood of Being off IS Without GVHD at 5 Year Time Horizon

**eTable 5.** Proposed Scoring Algorithm for Each Landmark Time

This supplementary material has been provided by the authors to give readers additional information about their work.

## **eMethods. Detailed Methodology**

### Data collection schedule on BMT CTN 0201 and 0402 trials:

Weekly acute GVHD information was collected on both trials until day 98. For CTN 0201, acute GVHD and chronic GVHD information and IS data were collected at day 90, 120, 180, 365, 730, and 1095. For CTN 0402, acute GVHD and chronic GVHD information and IS data were collected at day 100, 120, 180, 270, 365, and 730. Data on acute GVHD, chronic GVHD, graft failure, relapse and death underwent review by an endpoint review committee as part of the primary analysis for both trials.

### IS taper recommendations on BMT CTN 0201 and 0402 trials:

The 0201 protocol recommended initiation of IS taper (either cyclosporine or tacrolimus) at 50 days post-HCT in the absence of GVHD with slow taper over a minimum of 20 weeks to complete ISD. The 0402 trial recommended sirolimus and tacrolimus taper initiation at 100 days post-HCT in the absence of GVHD and disease relapse with the goal of complete ISD by 6 months post-HCT.

**eFigure 1. Multistate model for discontinuation of IS. Numbers by each transition line indicate the number of patients undergoing that transition.**

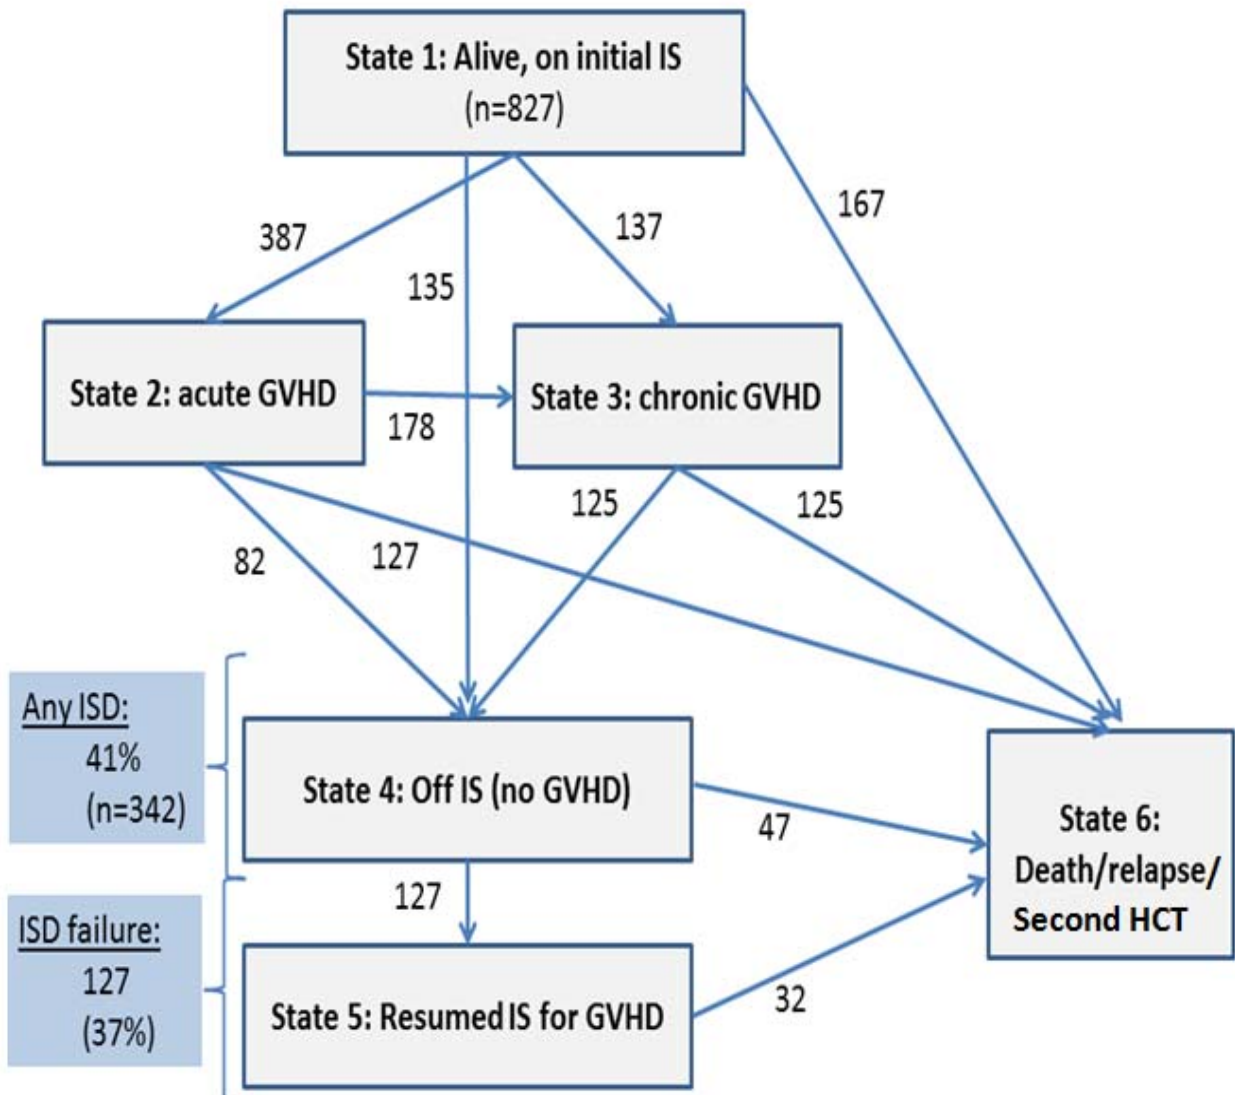

**eFigure 2. State probability from time of ISD failure (resuming IS for GVHD occurring after failed ISD attempt).**

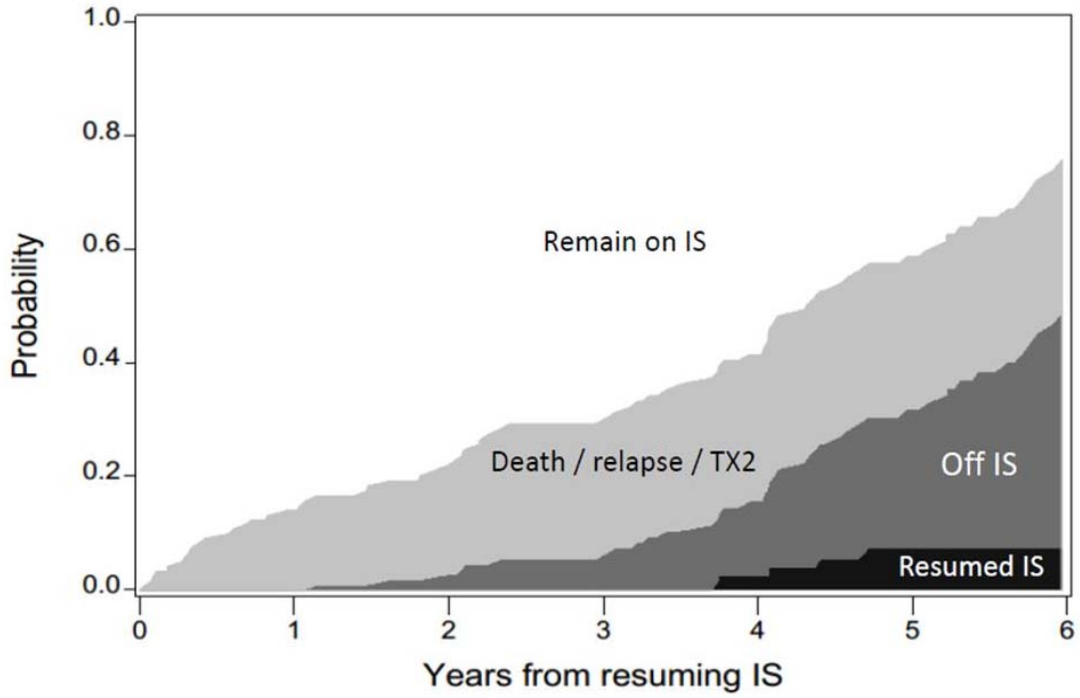

|                                              |     |     |     |     |     |     |
|----------------------------------------------|-----|-----|-----|-----|-----|-----|
| Remain on IS                                 | 86% | 78% | 71% | 59% | 41% | 24% |
| Death / relapse / 2 <sup>nd</sup> transplant | 14% | 19% | 24% | 26% | 27% | 27% |
| Off IS                                       | 0%  | 3%  | 5%  | 13% | 25% | 41% |
| Resumed IS for GVHD                          | 0%  | 0%  | 0%  | 2%  | 7%  | 7%  |

**eTable 1. Characteristics of Patients From CTN 0201 and CTN 0402**

|                                                 | <b>CTN 0201</b> | <b>CTN 0402</b> | <b>TOTAL</b> |
|-------------------------------------------------|-----------------|-----------------|--------------|
| Variable                                        | N (%)           | N (%)           | N (%)        |
| <b>Total number of patients</b>                 | <b>526</b>      | <b>301</b>      | <b>827</b>   |
| Age at transplant, years                        |                 |                 |              |
| Median                                          | 44 (<1-67)      | 44 (13-59)      | 44 (<1-67)   |
| Karnofsky performance score                     |                 |                 |              |
| ≥90                                             | 328 (62)        | 215 (71)        | 543 (66)     |
| <90                                             | 142 (27)        | 86 (29)         | 228 (28)     |
| Unknown                                         | 56 (11)         | 0 (0)           | 56 (7)       |
| Disease                                         |                 |                 |              |
| AML                                             | 252 (48)        | 134 (45)        | 386 (47)     |
| ALL                                             | 111 (21)        | 117 (39)        | 228 (28)     |
| CML                                             | 63 (12)         | 22 (7)          | 85 (10)      |
| MDS                                             | 87 (17)         | 26 (9)          | 113 (14)     |
| Acute Biphenotypic Leukemia                     | 0 (0)           | 2 (1)           | 2 (<1)       |
| CMML                                            | 7 (1)           | 0 (0)           | 7 (1)        |
| Agnogenic Myeloid Metaplasia with Myelofibrosis | 6 (1)           | 0 (0)           | 6 (1)        |
| Patient race/ethnicity                          |                 |                 |              |
| White-non Hispanic                              | 444 (84)        | 215 (71)        | 659 (80)     |
| Any race-Hispanic                               | 22 (4)          | 49 (16)         | 71 (9)       |
| Black-non Hispanic                              | 21 (4)          | 13 (4)          | 34 (4)       |
| Others/unknown                                  | 39 (7)          | 24 (8)          | 63 (8)       |
| Disease risk                                    |                 |                 |              |
| Early                                           | 241 (46)        | 235 (78)        | 476 (58)     |
| Intermediate                                    | 131 (25)        | 46 (15)         | 177 (21)     |
| Advanced                                        | 154 (29)        | 20 (7)          | 174 (21)     |
| Conditioning regimen                            |                 |                 |              |
| Cy+TBI                                          | 248 (47)        | 243 (81)        | 491 (59)     |
| Bu+Cy                                           | 160 (30)        | 0 (0)           | 160 (19)     |
| VP16+TBI                                        | 0 (0)           | 58 (19)         | 58 (7)       |
| Fludarabine+Melphalan                           | 40 (8)          | 0 (0)           | 40 (5)       |
| Fludarabine+Bu+ATG                              | 78 (15)         | 0 (0)           | 78 (9)       |
| Donor type                                      |                 |                 |              |
| Matched sibling donor                           | 0 (0)           | 301 (100)       | 301 (36)     |
| Unrelated 8/8                                   | 409 (78)        | 0 (0)           | 409 (49)     |
| Unrelated 7/8                                   | 105 (20)        | 0 (0)           | 105 (13)     |
| Unrelated <7/8                                  | 12 (2)          | 0 (0)           | 12 (1)       |
| Unrelated donor age at transplant, years        |                 |                 |              |
| Median                                          | 33 (18-61)      | NA              | 33 (18-61)   |

|                                                               |             |            |             |
|---------------------------------------------------------------|-------------|------------|-------------|
| Recipient/donor gender match                                  |             |            |             |
| M-M                                                           | 225 (43)    | 85 (28)    | 310 (37)    |
| M-F                                                           | 71 (13)     | 63 (21)    | 134 (16)    |
| F-M                                                           | 140 (27)    | 78 (26)    | 218 (26)    |
| F-F                                                           | 90 (17)     | 49 (16)    | 139 (17)    |
| M (donor unknown)                                             | 0 (0)       | 12 ( 4)    | 12 ( 1)     |
| F (donor unknown)                                             | 0 (0)       | 14 ( 5)    | 14 ( 2)     |
| Donor parity                                                  |             |            |             |
| Parous female                                                 | 65 (12)     | 83 (28)    | 148 (18)    |
| Non-parous female                                             | 90 (17)     | 29 (10)    | 119 (14)    |
| Female-unknown parity                                         | 6 ( 1)      | 0 (0)      | 6 ( 1)      |
| Male                                                          | 365 (69)    | 163 (54)   | 528 (64)    |
| Donor gender unknown                                          | 0 (0)       | 26 ( 9)    | 26 ( 3)     |
| Graft type                                                    |             |            |             |
| Bone marrow                                                   | 264 (50)    | 0 (0)      | 264 (32)    |
| Peripheral blood stem cell                                    | 262 (50)    | 301 (100)  | 563 (68)    |
| ATG use                                                       |             |            |             |
| No ATG                                                        | 376 (71)    | 301 (100)  | 677 (82)    |
| ATG                                                           | 137 (26)    | 0 (0)      | 137 (17)    |
| Unknown                                                       | 13 ( 2)     | 0 (0)      | 13 ( 2)     |
| GVHD prophylaxis                                              |             |            |             |
| CSA/MTX                                                       | 121 (23)    | 0 (0)      | 121 (15)    |
| Tacrolimus/MTX                                                | 378 (72)    | 152 (50)   | 530 (64)    |
| Tacrolimus/Sirolimus                                          | 3 ( 1)      | 149 (50)   | 152 (18)    |
| Other                                                         | 24 (5)      | 0 (0)      | 24 (3)      |
| Duration of follow up among survivors, months (median, range) | 79 (11-124) | 61 (24-97) | 72 (11-124) |

\***Disease:** AML – acute myelogenous leukemia, ALL – acute lymphoblastic leukemia, MDS – myelodysplastic syndrome, CMML – chronic myelomonocytic leukemia, **Disease risk** per CIBMTR classification: Early-stage disease includes AML and ALL in first complete remission, CML in first chronic phase, and MDS subtype refractory anemia. Intermediate-stage disease includes AML or ALL in second or subsequent complete remission or in first relapse or CML in accelerated phase or second chronic phase. Advanced-stage disease includes AML in second or greater relapse or primary induction failure, CML in blast phase, MDS subtype refractory anemia with excess blasts or in transformation, or MDS not otherwise classified. **Conditioning regimen:** Cy – cyclophosphamide, TBI – total body irradiation, Bu – busulfan, VP16 – etoposide, ATG – anti-thymocyte globulin. **Gender match:** M - male, F – female. **GVHD prophylaxis:** CSA – cyclosporine, MTX – methotrexate.

**eTable 2. Dynamic Prediction Model of Likelihood of Being off IS Without GVHD at 1 Year Time Horizon.**

| Effect                                       | LN(OR) | OR    | 95% CI           | p-value       |
|----------------------------------------------|--------|-------|------------------|---------------|
| <b>Intercept</b>                             | -1.031 | 0.357 | (0.251 , 0.591)  | 0.0001        |
| <b>ltime (years)</b>                         | 1.238  | 3.449 | (2.314 , 5.140)  | 0.0000        |
| <b>ltime*ltime</b>                           | -0.156 | 0.856 | (0.794 , 0.922)  | 0.0000        |
| <b>Graft type (unrelated only)</b>           |        |       |                  |               |
| Bone marrow                                  | 0.000  | 1.000 | -                | -             |
| Peripheral blood                             | -0.710 | 0.492 | (0.329 , 0.735)  | 0.0005        |
| <b>Donor type</b>                            |        |       |                  | 0.0718 (2 df) |
| Matched related                              | 0.000  | 1.000 | -                | -             |
| Matched unrelated                            | 0.015  | 1.015 | (0.671 , 1.534)  | 0.9445        |
| Mismatched unrelated                         | -0.565 | 0.569 | (0.313 , 1.033)  | 0.0638        |
| <b>Age (years)</b>                           |        |       |                  |               |
| 0-50                                         | 0.000  | 1.000 | -                | -             |
| > 50                                         | -0.508 | 0.601 | (0.420 , 0.860)  | 0.0054        |
| <b>Disease risk</b>                          |        |       |                  |               |
| Early                                        | 0.000  | 1.000 | -                | -             |
| Intermediate or advanced                     | -0.463 | 0.629 | (0.454 , 0.872)  | 0.0054        |
| <b>State history</b>                         |        |       |                  | 0.0000 (4 df) |
| On IS, no chronic GVHD                       | 0.000  | 1.000 | -                | -             |
| Chronic GVHD, no current skin involvement    | -1.669 | 0.189 | (0.107 , 0.333)  | 0.0000        |
| Chronic GVHD, current skin involvement       | -2.668 | 0.069 | (0.036 , 0.134)  | 0.0000        |
| ISD, short duration spent on IS <sup>1</sup> | 1.296  | 3.654 | (2.326 , 5.740)  | 0.0000        |
| ISD, long duration spent on IS <sup>2</sup>  | 2.274  | 9.722 | (5.418 , 17.444) | 0.0000        |

<sup>1</sup> Short duration spent on IS

- IS discontinued ≤ 180 days after transplant if no post-transplant GVHD
- IS discontinued ≤ 240 days from acute GVHD onset if history of prior acute GVHD
- IS discontinued ≤ 640 days from chronic GVHD onset if history of prior chronic GVHD

<sup>2</sup> Long duration spent on IS

- IS discontinued > 180 days after transplant if no post-transplant GVHD
- IS discontinued > 240 days from acute GVHD onset if history of prior acute GVHD
- IS discontinued > 640 days from chronic GVHD onset if history of prior chronic GVHD

**eTable 3: Dynamic prediction model of likelihood of being off IS without GVHD at 3 year time horizon.**

| Effect                                       | LN(OR) | OR    | 95% CI           | p-value       |
|----------------------------------------------|--------|-------|------------------|---------------|
| <b>Intercept</b>                             | -0.732 | 0.481 | (0.281 , 0.824)  | 0.0077        |
| <b>ltime (years)</b>                         | 1.851  | 6.366 | (3.961 , 10.233) | 0.0000        |
| <b>ltime*ltime</b>                           | -0.373 | 0.688 | (0.608 , 0.780)  | 0.0000        |
| <b>Graft type (unrelated only)</b>           |        |       |                  |               |
| Bone marrow                                  | 0.000  | 1.000 | -                | -             |
| Peripheral blood                             | -1.045 | 0.352 | (0.225 , 0.550)  | 0.0000        |
| <b>Donor type</b>                            |        |       |                  | 0.0406 (2 df) |
| Matched related                              | 0.000  | 1.000 | -                | -             |
| Matched unrelated                            | 0.139  | 1.149 | (0.725 , 1.823)  | 0.5545        |
| Mismatched unrelated                         | -0.670 | 0.512 | (0.247 , 1.060)  | 0.0715        |
| <b>Age (years)</b>                           |        |       |                  |               |
| 0-50                                         | 0.000  | 1.000 | -                | -             |
| > 50                                         | -0.691 | 0.501 | (0.327 , 0.768)  | 0.0015        |
| <b>State history</b>                         |        |       |                  | 0.0000 (4 df) |
| On IS, no chronic GVHD                       | 0.000  | 1.000 | -                | -             |
| Chronic GVHD, no current skin involvement    | -1.135 | 0.321 | (0.195 , 0.531)  | 0.0000        |
| Chronic GVHD, current skin involvement       | -1.699 | 0.183 | (0.100 , 0.336)  | 0.0000        |
| ISD, short duration spent on IS <sup>1</sup> | 0.223  | 1.25  | (0.736 , 2.123)  | 0.4089        |
| ISD, long duration spent on IS <sup>2</sup>  | 1.379  | 3.97  | (2.103 , 7.494)  | 0.0000        |

<sup>1</sup> Short duration spent on IS

- IS discontinued ≤ 180 days after transplant if no post-transplant GVHD
- IS discontinued ≤ 240 days from acute GVHD onset if history of prior acute GVHD
- IS discontinued ≤ 640 days from chronic GVHD onset if history of prior chronic GVHD

<sup>2</sup> Long duration spent on IS

- IS discontinued > 180 days after transplant if no post-transplant GVHD
- IS discontinued > 240 days from acute GVHD onset if history of prior acute GVHD
- IS discontinued > 640 days from chronic GVHD onset if history of prior chronic GVHD



**eTable 4: Dynamic prediction model of likelihood of being off IS without GVHD at 5 year time horizon.**

| Effect                                       | LN(OR) | OR    | 95% CI          | p-value       |
|----------------------------------------------|--------|-------|-----------------|---------------|
| <b>Intercept</b>                             | -0.698 | 0.497 | (0.277 , 0.894) | 0.0195        |
| <b>ltime (years)</b>                         | 1.784  | 5.951 | (3.877 , 9.135) | 0.0000        |
| <b>ltime*ltime</b>                           | -0.509 | 0.601 | (0.398 , 0.908) | 0.0157        |
| <b>Graft type (unrelated only)</b>           |        |       |                 |               |
| Bone marrow                                  | 0.000  | 1.000 | -               | -             |
| Peripheral blood                             | -0.948 | 0.388 | (0.237 , 0.634) | 0.0002        |
| <b>Donor type</b>                            |        |       |                 | 0.0079 (2 df) |
| Matched related                              | 0.000  | 1.000 | -               | -             |
| Matched unrelated                            | 0.306  | 1.358 | (0.831 , 2.220) | 0.2219        |
| Mismatched unrelated                         | -0.760 | 0.468 | (0.213 , 1.028) | 0.0587        |
| <b>Age (years)</b>                           |        |       |                 |               |
| 0-50                                         | 0.000  | 1.000 | -               | -             |
| > 50                                         | -0.867 | 0.420 | (0.257 , 0.686) | 0.0005        |
| <b>State history</b>                         |        |       |                 | 0.0007 (4 df) |
| On IS, no chronic GVHD                       | 0.000  | 1.000 | -               | -             |
| Chronic GVHD, no current skin involvement    | -0.384 | 0.681 | (0.421 , 1.102) | 0.1174        |
| Chronic GVHD, current skin involvement       | -0.622 | 0.537 | (0.295 , 0.977) | 0.0417        |
| ISD, short duration spent on IS <sup>1</sup> | -0.169 | 0.845 | (0.488 , 1.462) | 0.5462        |
| ISD, long duration spent on IS <sup>2</sup>  | 1.052  | 2.864 | (1.421 , 5.770) | 0.0032        |

<sup>1</sup> Short duration spent on IS

- IS discontinued ≤ 180 days after transplant if no post-transplant GVHD
- IS discontinued ≤ 240 days from acute GVHD onset if history of prior acute GVHD
- IS discontinued ≤ 640 days from chronic GVHD onset if history of prior chronic GVHD

<sup>2</sup> Long duration spent on IS

- IS discontinued > 180 days after transplant if no post-transplant GVHD
- IS discontinued > 240 days from acute GVHD onset if history of prior acute GVHD
- IS discontinued > 640 days from chronic GVHD onset if history of prior chronic GVHD

**eTable 5: Proposed Scoring Algorithm for each landmark time.**

| Variable      | Level                                        | Score          |                |                |
|---------------|----------------------------------------------|----------------|----------------|----------------|
|               |                                              | 1 year horizon | 3 year horizon | 5 year horizon |
| Graft type    | BM                                           | 0              | 0              | 0              |
|               | PB                                           | -1             | -2             | -2             |
| Donor type    | Matched related                              | 0              | 0              | 0              |
|               | Matched unrelated                            | 0              | 0              | 0              |
|               | Mismatched unrelated                         | -1             | -2             | -2             |
| Age           | 0-50                                         | 0              | 0              | 0              |
|               | >50                                          | -1             | -1             | -2             |
| Disease risk  | Early                                        | 0              | 0              | 0              |
|               | Intermediate/Advanced                        | -1             | 0              | 0              |
| Current state | On IS, no chronic GVHD                       | 0              | 0              | 0              |
|               | Chronic GVHD, no current skin involvement    | -3             | -2             | -1             |
|               | Chronic GVHD, current skin involvement       | -5             | -3             | -1             |
|               | ISD, short duration spent on IS <sup>1</sup> | 3              | 0              | 0              |
|               | ISD, long duration spent on IS <sup>2</sup>  | 5              | 3              | 2              |

<sup>1</sup> Short duration spent on IS

- IS discontinued ≤ 180 days after transplant if no post-transplant GVHD
- IS discontinued ≤ 240 days from acute GVHD onset if history of prior acute GVHD
- IS discontinued ≤ 640 days from chronic GVHD onset if history of prior chronic GVHD

<sup>2</sup> Long duration spent on IS

- IS discontinued > 180 days after transplant if no post-transplant GVHD
- IS discontinued > 240 days from acute GVHD onset if history of prior acute GVHD
- IS discontinued > 640 days from chronic GVHD onset if history of prior chronic GVHD

As an example of using this scoring system, consider a 55 year old patient with an early disease risk status that received a peripheral blood, matched related HCT and is still on IS at two years post-transplant. Suppose that interest lies in predicting the patient's chance of being off IS at three years post-transplant given their current status at two years. The three-year post-TX prediction time lies one year subsequent to the two-year post-TX landmark time. Therefore, the 1-year landmark model displayed in Figure 3a and Table S5 is applicable. Applying the 1-year horizon column on Table S5 gives a risk score of  $(-1) + 0 + (-1) + 0 + 0 = -2$  for this patient. Examining the curve in Figure 3a corresponding to a score of -2, we see that at the 2-year landmark time on the x-axis, the predicted chance that this patient is off IS at 3 years post-transplant is 40%.
